# Supplementary material for: Reversible solid bromine complexation into Ti3C2Tx MXene carriers: a highly active electrode for bromine-based flow batteries with ultralow self-discharge
Source: Royal Society of Chemistry journal article supplement (doi:10.1039/d4ee00580e), 2024-01-01
Supplement: d4ee00580e4.pdf [file d4ee00580e4.pdf]

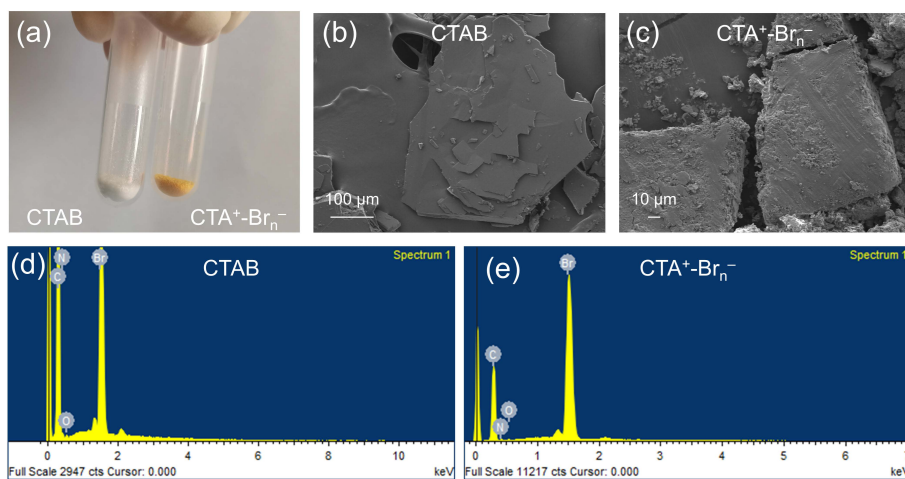

**Fig. S11** (a) Photographs of CTAB and CTA<sup>+</sup>-Br<sub>n</sub><sup>-</sup>. SEM images of (b) CTAB and (c) CTA<sup>+</sup>-Br<sub>n</sub><sup>-</sup>. EDS energy spectra of (d) CTAB and (e) CTA<sup>+</sup>-Br<sub>n</sub><sup>-</sup>.
