# Supplementary material for: Reversible solid bromine complexation into Ti3C2Tx MXene carriers: a highly active electrode for bromine-based flow batteries with ultralow self-discharge
Source: Royal Society of Chemistry journal article supplement (doi:10.1039/d4ee00580e), 2024-01-01
Supplement: d4ee00580e5.pdf [file d4ee00580e5.pdf]

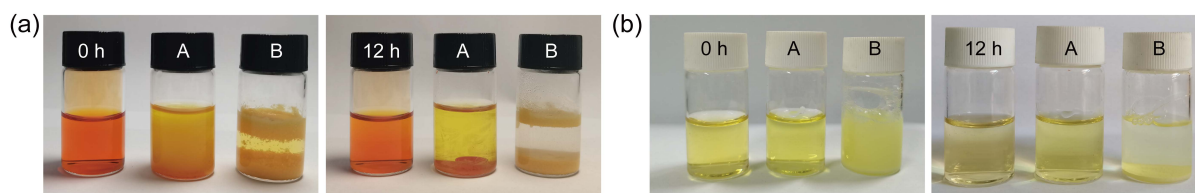

**Fig. S12** Digital photographs of the color change of (a) the 0.2 M bromine solution over time after the addition of 5 mM MEPBr (solution A) or CTAB (solution B) and (b) the 10 mM bromine solution over time after the addition of 1 mM MEPBr (solution A) or CTAB (solution B).
