# Supplementary material for: Reversible solid bromine complexation into Ti3C2Tx MXene carriers: a highly active electrode for bromine-based flow batteries with ultralow self-discharge
Source: Royal Society of Chemistry journal article supplement (doi:10.1039/d4ee00580e), 2024-01-01
Supplement: d4ee00580e6.pdf [file d4ee00580e6.pdf]

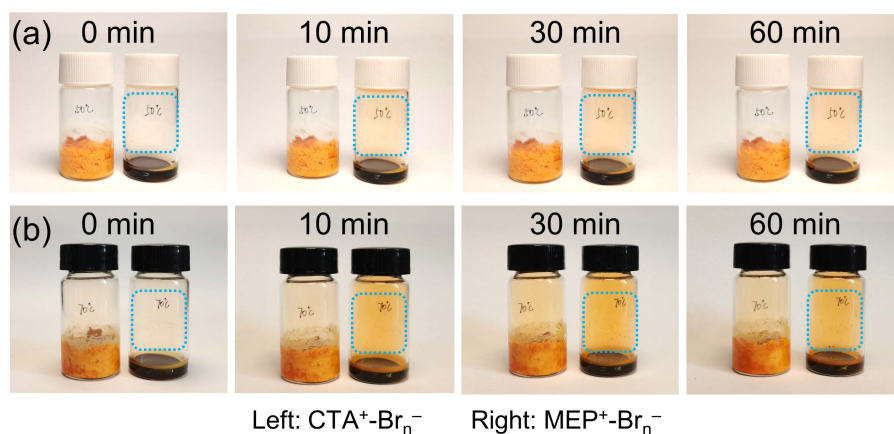

**Fig. S13** Photographs of  $\text{CTA}^+\text{-Br}_n^-$  and  $\text{MEP}^+\text{-Br}_n^-$  after being heated at (a) 50°C and (b) 70°C for different times.
