# Supplementary material for: Reversible solid bromine complexation into Ti3C2Tx MXene carriers: a highly active electrode for bromine-based flow batteries with ultralow self-discharge
Source: Royal Society of Chemistry journal article supplement (doi:10.1039/d4ee00580e), 2024-01-01
Supplement: d4ee00580e7.pdf [file d4ee00580e7.pdf]

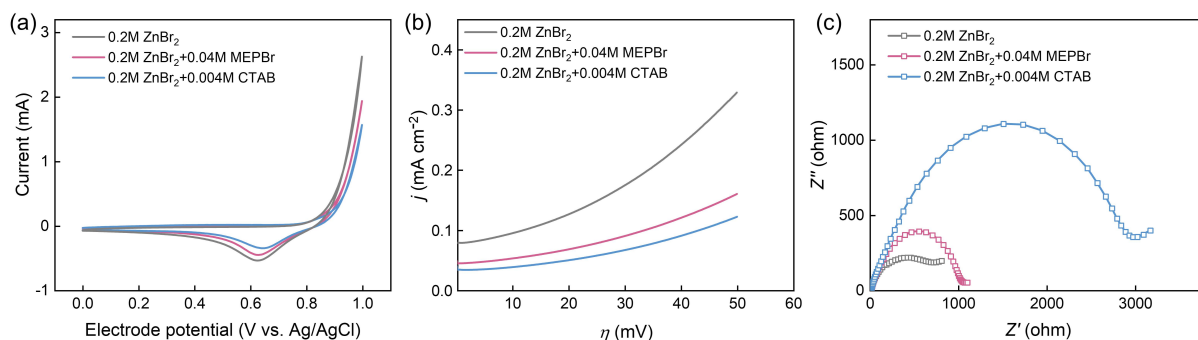

**Fig. S14** The electrochemical performance of GC electrode in the electrolytes with MEPBr or CTAB as additives. (a) CV curves of at the scan rate of 10 mV s<sup>-1</sup>. (b) LSV curves at the scan rate of 1 mV s<sup>-1</sup>. (c) Nyquist plots.

The solid bromine complexes in electrolytes will block the pipeline and affect electrolyte flowing, which is
