# Supplementary material for: Reversible solid bromine complexation into Ti3C2Tx MXene carriers: a highly active electrode for bromine-based flow batteries with ultralow self-discharge
Source: Royal Society of Chemistry journal article supplement (doi:10.1039/d4ee00580e), 2024-01-01
Supplement: d4ee00580e8.pdf [file d4ee00580e8.pdf]

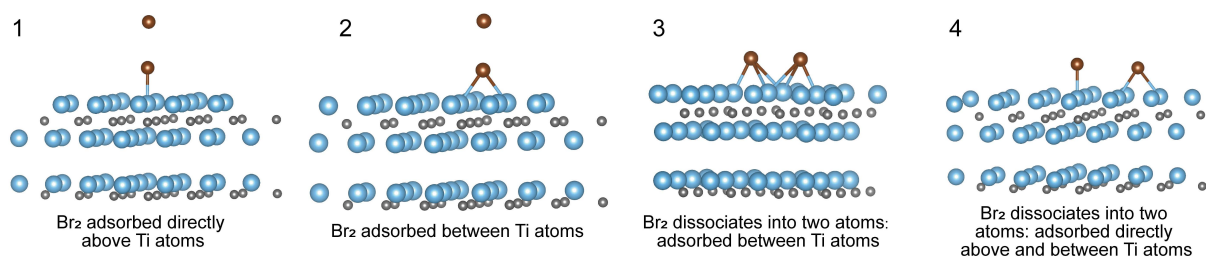

**Fig. S15** Four structures of  $\text{Ti}_3\text{C}_2\text{T}_x$  surfaces which absorb bromine molecules (blue spheres: Ti atoms; gray spheres: C atoms; brown spheres: Br atoms).
