# Supplementary material for: Reversible solid bromine complexation into Ti3C2Tx MXene carriers: a highly active electrode for bromine-based flow batteries with ultralow self-discharge
Source: Royal Society of Chemistry journal article supplement (doi:10.1039/d4ee00580e), 2024-01-01
Supplement: d4ee00580e11.pdf [file d4ee00580e11.pdf]

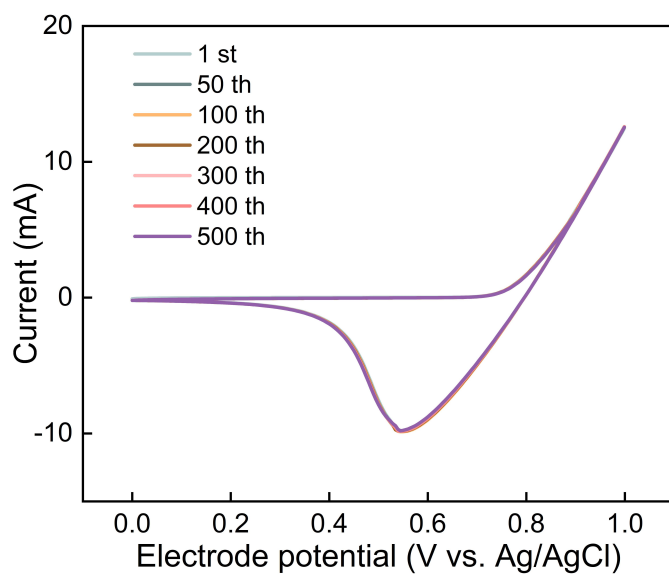

**Fig. S18** CV stability test of TiCGC at the scan rate of  $50 \text{ mV s}^{-1}$  in the electrolyte of  $2 \text{ M ZnBr}_2 + 3 \text{ M KCl}$  (vs. Ag/AgCl).
