# Supplementary material for: Reversible solid bromine complexation into Ti3C2Tx MXene carriers: a highly active electrode for bromine-based flow batteries with ultralow self-discharge
Source: Royal Society of Chemistry journal article supplement (doi:10.1039/d4ee00580e), 2024-01-01
Supplement: d4ee00580e12.pdf [file d4ee00580e12.pdf]

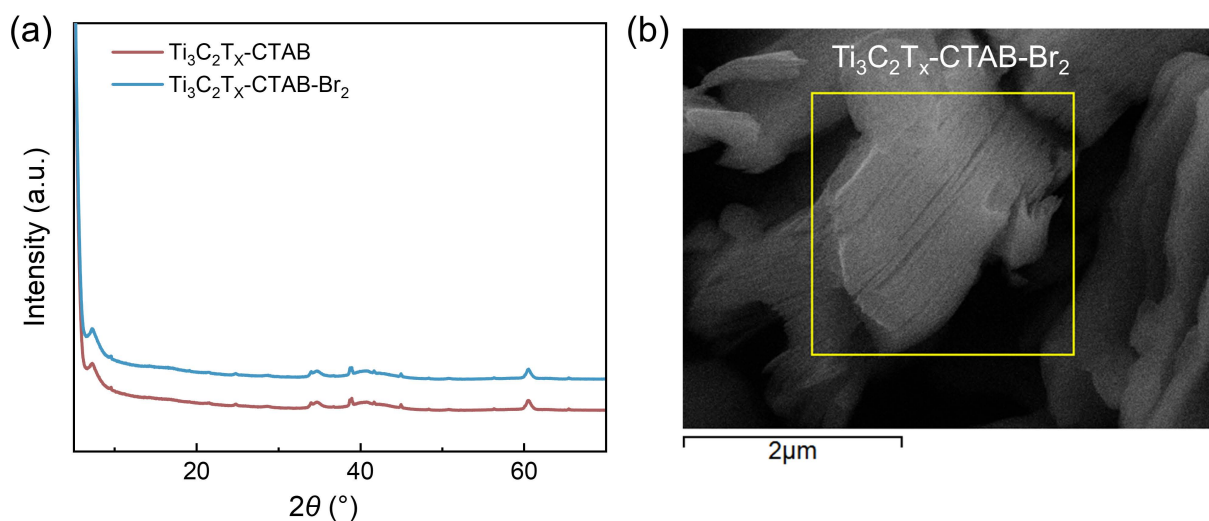

**Fig. S19 (a) The XRD patterns of  $\text{Ti}_3\text{C}_2\text{T}_x\text{-CTAB}$  and  $\text{Ti}_3\text{C}_2\text{T}_x\text{-CTAB-Br}_2$  (after  $\text{Ti}_3\text{C}_2\text{T}_x\text{-CTAB}$  reacting with bromine species). (b) SEM image of  $\text{Ti}_3\text{C}_2\text{T}_x\text{-CTAB-Br}_2$ .**
