# Supplementary material for: Reversible solid bromine complexation into Ti3C2Tx MXene carriers: a highly active electrode for bromine-based flow batteries with ultralow self-discharge
Source: Royal Society of Chemistry journal article supplement (doi:10.1039/d4ee00580e), 2024-01-01
Supplement: d4ee00580e14.pdf [file d4ee00580e14.pdf]

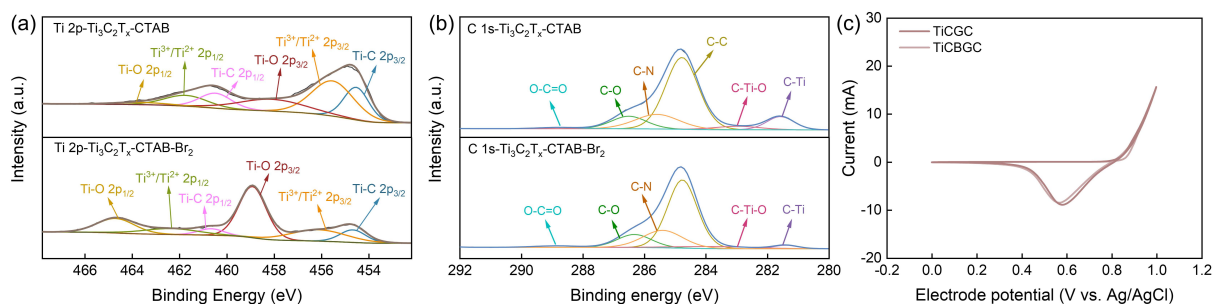

**Fig. S20** High-resolution (a) Ti 2p and (b) C 1s XPS spectra of Ti<sub>3</sub>C<sub>2</sub>T<sub>x</sub>-CTAB and Ti<sub>3</sub>C<sub>2</sub>T<sub>x</sub>-CTAB-Br<sub>2</sub>. (c) CV curves of TiCGC and TiCBGC in 2 M ZnBr<sub>2</sub> + 3 M KCl + 0.4 M MEPBr at the scan rate of 10 mV s<sup>-1</sup>.
