# Supplementary material for: Reversible solid bromine complexation into Ti3C2Tx MXene carriers: a highly active electrode for bromine-based flow batteries with ultralow self-discharge
Source: Royal Society of Chemistry journal article supplement (doi:10.1039/d4ee00580e), 2024-01-01
Supplement: d4ee00580e15.pdf [file d4ee00580e15.pdf]

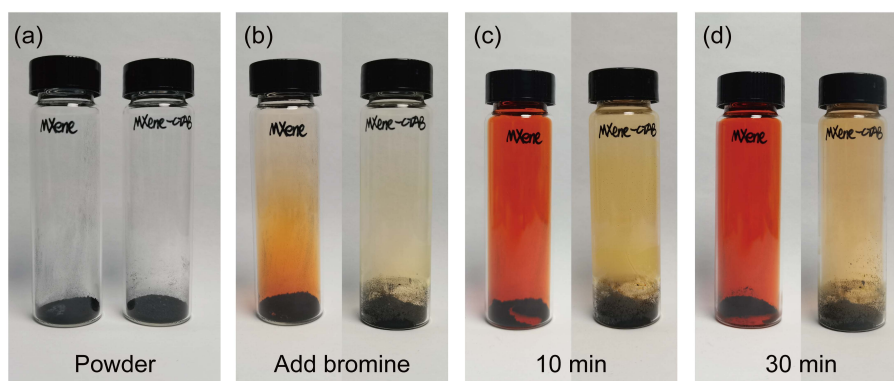

Left:  $\text{Ti}_3\text{C}_2\text{T}_x$  MXene Right:  $\text{Ti}_3\text{C}_2\text{T}_x$ -CTAB

**Fig. S21 Photographs of bromine-containing  $\text{Ti}_3\text{C}_2\text{T}_x$  (left) and  $\text{Ti}_3\text{C}_2\text{T}_x$ -CTAB (right) powder after heating at  $50^\circ\text{C}$  for different time.**

As shown in Fig. S21a–b, when bromine was added to  $\text{Ti}_3\text{C}_2\text{T}_x$  MXene powder, obvious bromine vapor was
