# Supplementary material for: Reversible solid bromine complexation into Ti3C2Tx MXene carriers: a highly active electrode for bromine-based flow batteries with ultralow self-discharge
Source: Royal Society of Chemistry journal article supplement (doi:10.1039/d4ee00580e), 2024-01-01
Supplement: d4ee00580e20.pdf [file d4ee00580e20.pdf]

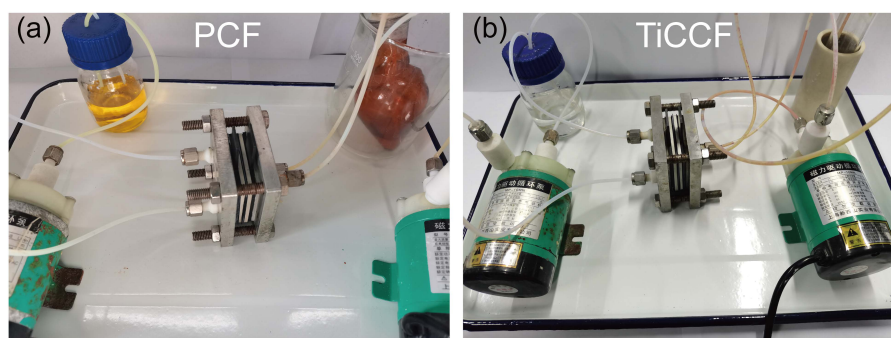

**Fig. S26** The electrolyte diffusion phenomenon of the BCA-free ZFBs using (a) PCF and (b) TiCCF as cathodes at  $80 \text{ mA cm}^{-2}$ .
