# Supplementary material for: Reversible solid bromine complexation into Ti3C2Tx MXene carriers: a highly active electrode for bromine-based flow batteries with ultralow self-discharge
Source: Royal Society of Chemistry journal article supplement (doi:10.1039/d4ee00580e), 2024-01-01
Supplement: d4ee00580e21.pdf [file d4ee00580e21.pdf]

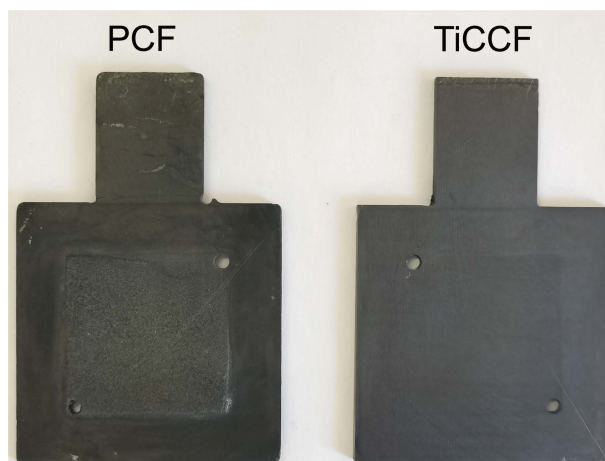

**Fig. S27 Comparison of corrosion of graphite plates at the positive side of (a) PCF and (b) TiCCF electrodes after cycling at  $80 \text{ mA cm}^{-2}$  when without MEPBr.**
