# Supplementary material for: Reversible solid bromine complexation into Ti3C2Tx MXene carriers: a highly active electrode for bromine-based flow batteries with ultralow self-discharge
Source: Royal Society of Chemistry journal article supplement (doi:10.1039/d4ee00580e), 2024-01-01
Supplement: d4ee00580e25.pdf [file d4ee00580e25.pdf]

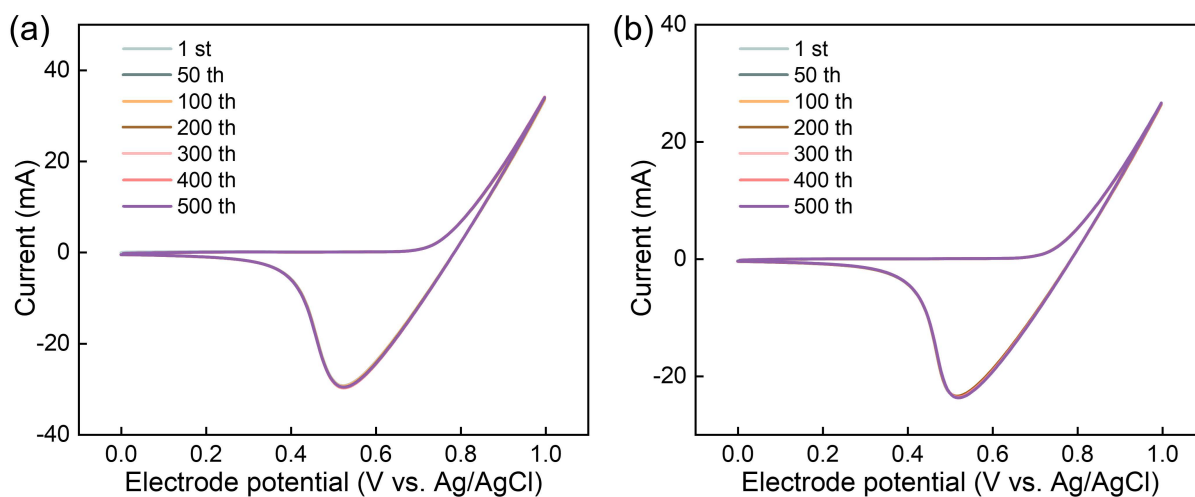

**Fig. S30** CV stability test of TiCCF at the scan rate of  $50 \text{ mV s}^{-1}$  in the electrolyte of (a)  $2 \text{ M ZnBr}_2 + 3 \text{ M KCl}$  and (b)  $2 \text{ M ZnBr}_2 + 3 \text{ M KCl} + 0.4 \text{ M MEPBr}$  (vs. Ag/AgCl).
