# Supplementary material for: Reversible solid bromine complexation into Ti3C2Tx MXene carriers: a highly active electrode for bromine-based flow batteries with ultralow self-discharge
Source: Royal Society of Chemistry journal article supplement (doi:10.1039/d4ee00580e), 2024-01-01
Supplement: d4ee00580e26.pdf [file d4ee00580e26.pdf]

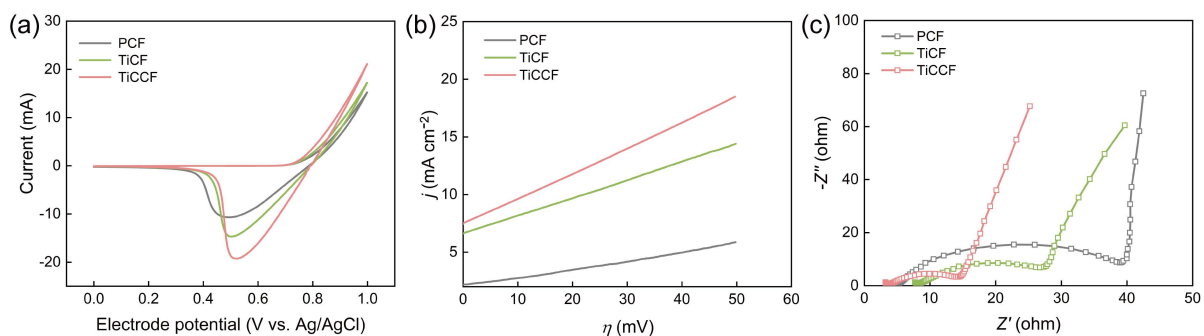

**Fig. S31** Electrochemical performance of PCF, TiCF and TiCCF in 2 M ZnBr<sub>2</sub> + 3 M KCl + 0.4 M MEPBr (with BCAs). (a) CV curves at the scan rate of 10 mV s<sup>-1</sup>. (b) LSV curves at the scan rate of 1 mV s<sup>-1</sup>. (c) Nyquist plots.
