# Supplementary material for: Reversible solid bromine complexation into Ti3C2Tx MXene carriers: a highly active electrode for bromine-based flow batteries with ultralow self-discharge
Source: Royal Society of Chemistry journal article supplement (doi:10.1039/d4ee00580e), 2024-01-01
Supplement: d4ee00580e29.pdf [file d4ee00580e29.pdf]

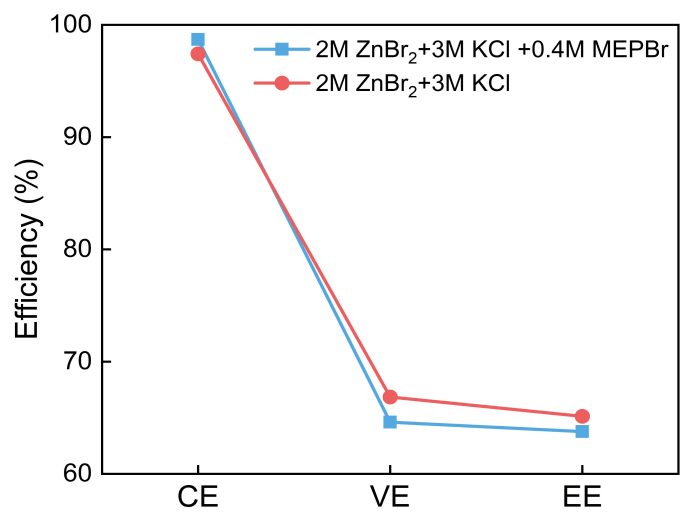

**Fig. S34** The performance of ZBFs assembled with TiCCF in the electrolyte with and without BCAs at 180 mA cm<sup>-2</sup>.
