# Supplementary figures and images for: Reversible solid bromine complexation into Ti3C2Tx MXene carriers: a highly active electrode for bromine-based flow batteries with ultralow self-discharge
Source: Royal Society of Chemistry journal article supplement (doi:10.1039/d4ee00580e), 2024-01-01

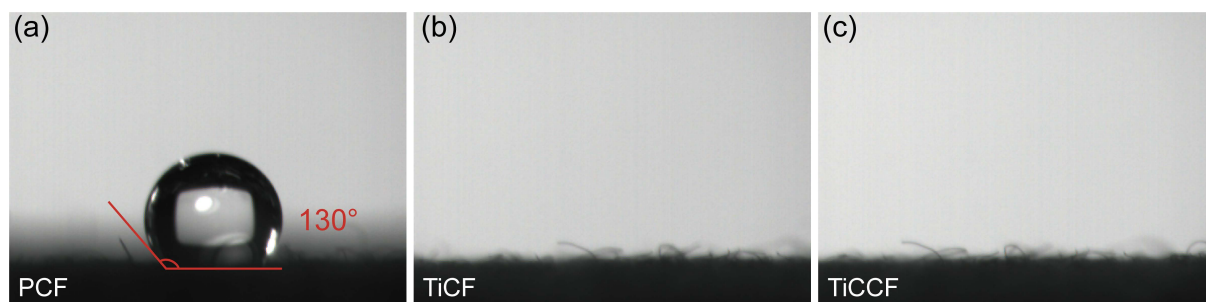

**Fig. S17** Electrolyte contact angles of (a) PCF; (b) TiCF; and (c) TiCCF.

Supplement: d4ee00580e10.pdf [file d4ee00580e10.pdf]

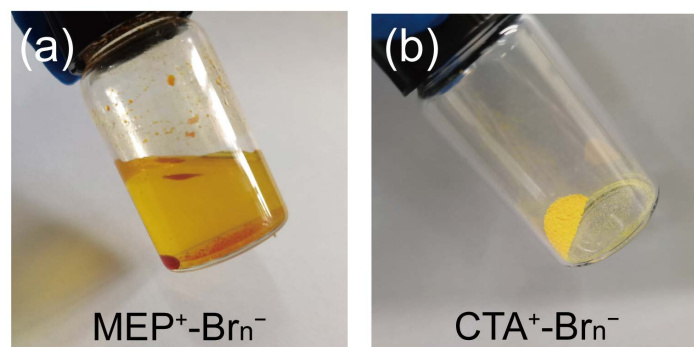

Fig. S2 The comparison of MEP<sup>+</sup>-Br<sub>n</sub><sup>-</sup> and CTA<sup>+</sup>-Br<sub>n</sub><sup>-</sup> complexes.

Supplement: d4ee00580e13.pdf [file d4ee00580e13.pdf]

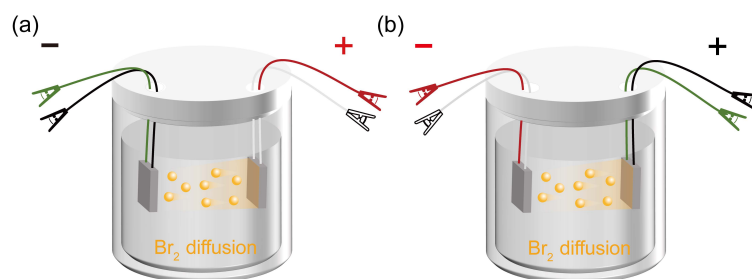

**Fig. S22** Schematic diagram of the visualization experiment device in (a) Fig. S23 and (b) Fig. S24.

Supplement: d4ee00580e16.pdf [file d4ee00580e16.pdf]

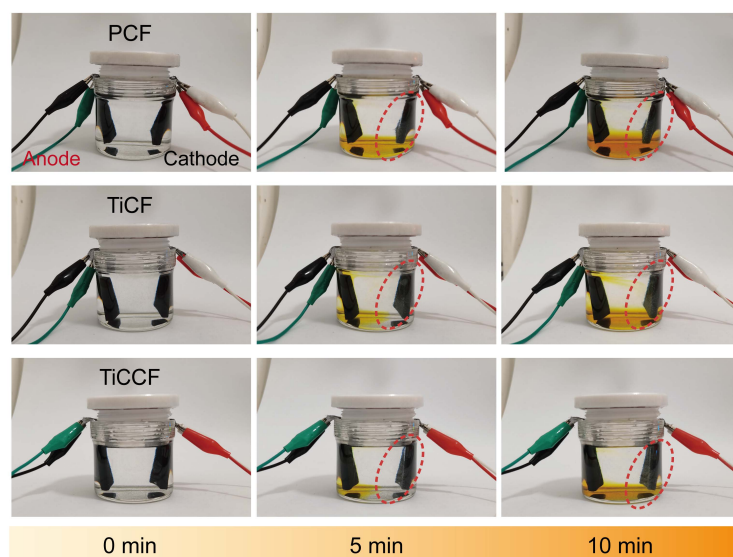

**Fig. S23** Photos of the color change during charging in 2 M  $\text{ZnBr}_2$  + 3 M KCl.

Supplement: d4ee00580e17.pdf [file d4ee00580e17.pdf]

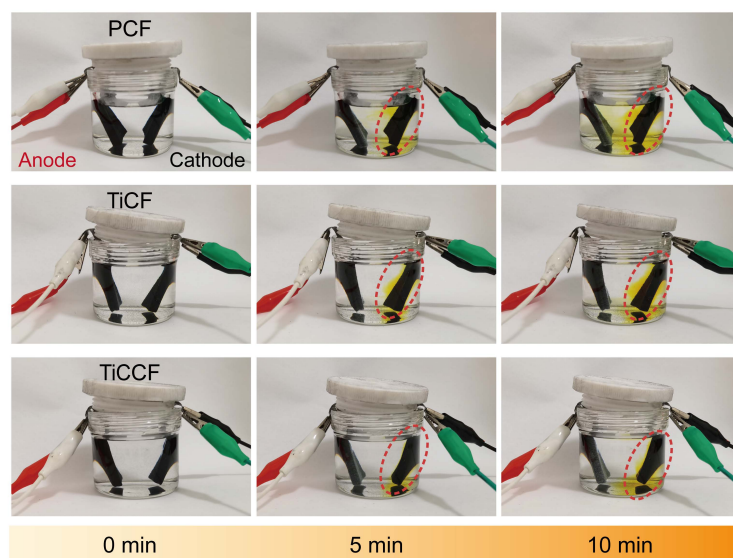

Fig. S24 Photos of the color change during charging in 2 M  $ZnBr_2$  + 3 M KCl + 0.4 M MEPBr.

Supplement: d4ee00580e18.pdf [file d4ee00580e18.pdf]

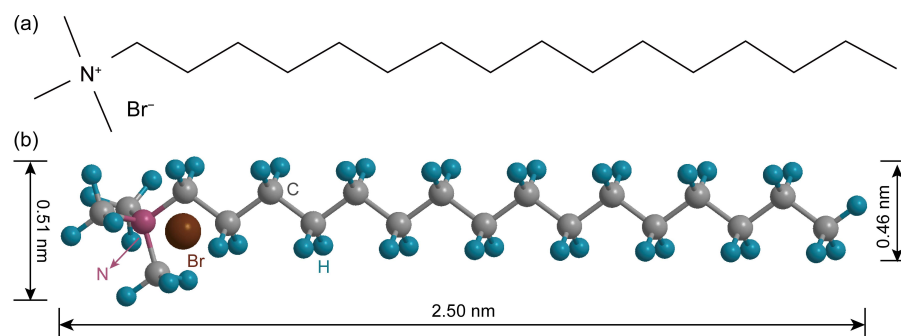

**Fig. S1** The formula and 3D structure of CTAB.

Supplement: d4ee00580e2.pdf [file d4ee00580e2.pdf]

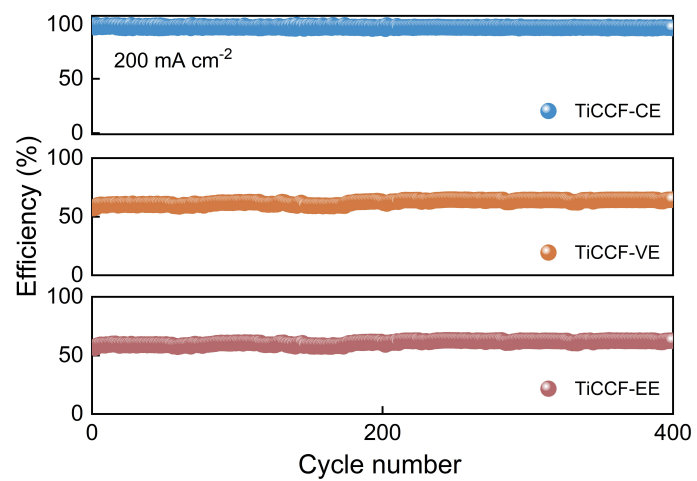

**Fig. S29** Cycling performance of the BCA-free ZFBF using TiCCF cathode at 200 mA cm<sup>-2</sup>.

Supplement: d4ee00580e23.pdf [file d4ee00580e23.pdf]

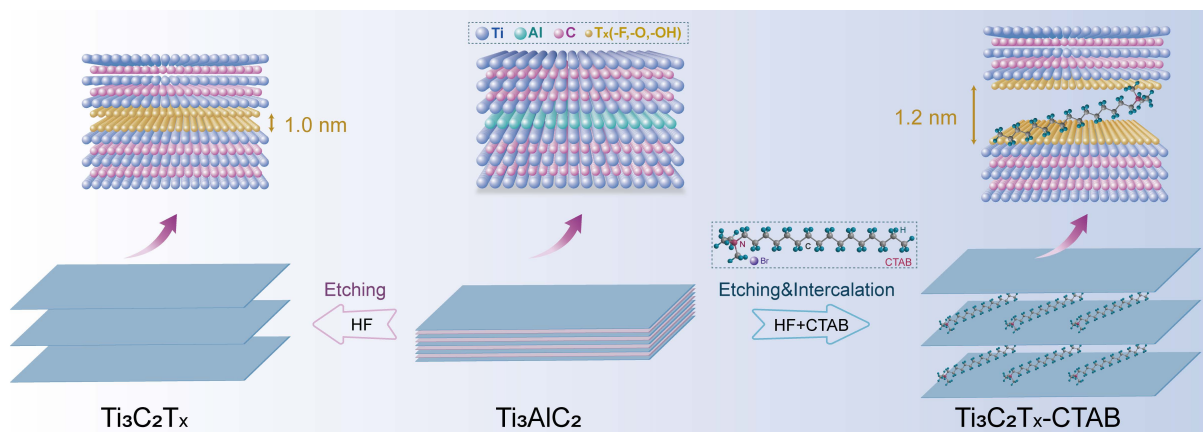

Fig. S3 Schematic illustration for the synthesis of  $Ti_3C_2T_x$  MXene and  $Ti_3C_2T_x-CTAB$ .

Supplement: d4ee00580e24.pdf [file d4ee00580e24.pdf]

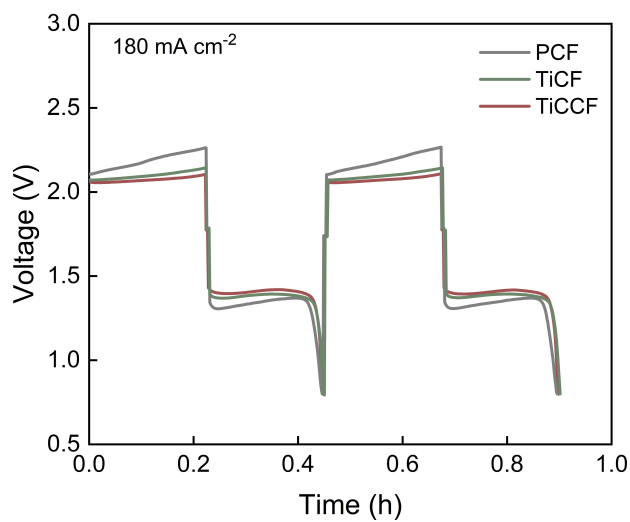

**Fig. S32** Charge-discharge curves of the ZBFs using PCF, TiCF and TiCCF cathodes at 180 mA cm<sup>-2</sup>.

Supplement: d4ee00580e27.pdf [file d4ee00580e27.pdf]

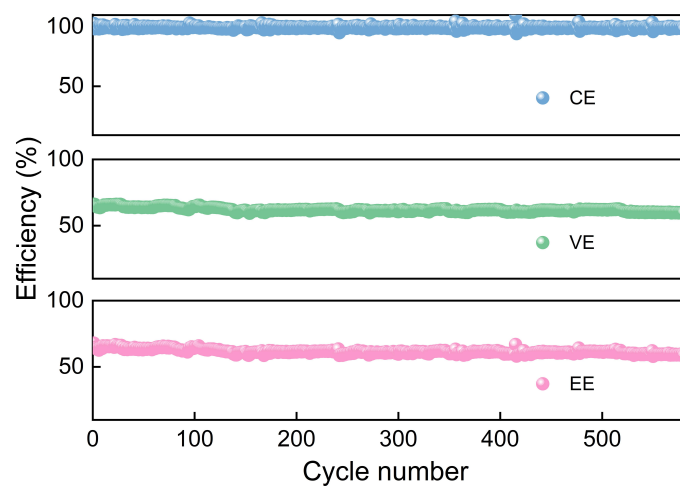

Fig. S33 Cycling performance of the ZFBF using TiCCF cathode at  $180 \text{ mA cm}^{-2}$ .

Supplement: d4ee00580e28.pdf [file d4ee00580e28.pdf]

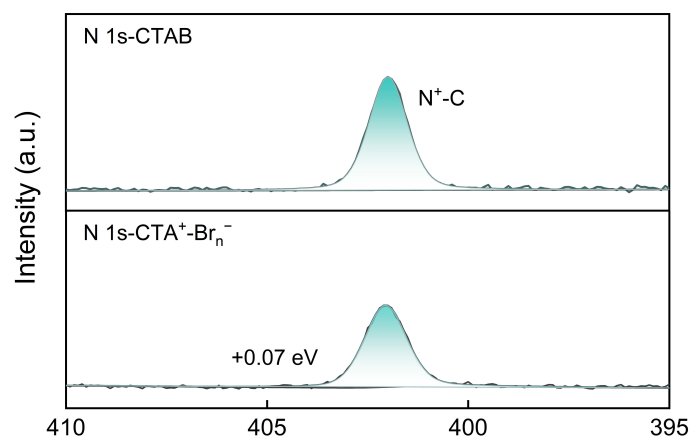

Fig. S10 High resolution N 1s XPS spectra of CTAB and CTA<sup>+</sup>-Br<sub>n</sub><sup>-</sup>.

Supplement: d4ee00580e3.pdf [file d4ee00580e3.pdf]

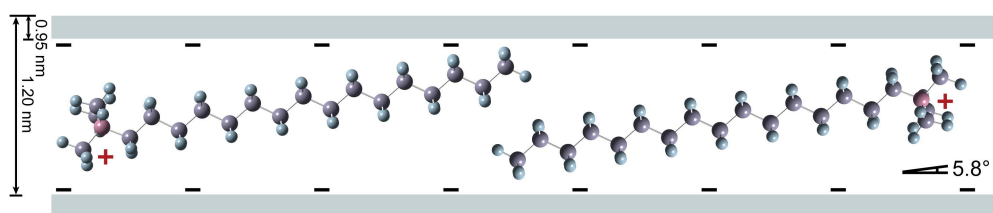

**Fig. S4** Possible position of CTA<sup>+</sup> in the interlayer of Ti<sub>3</sub>C<sub>2</sub>T<sub>x</sub> MXene.

Supplement: d4ee00580e30.pdf [file d4ee00580e30.pdf]

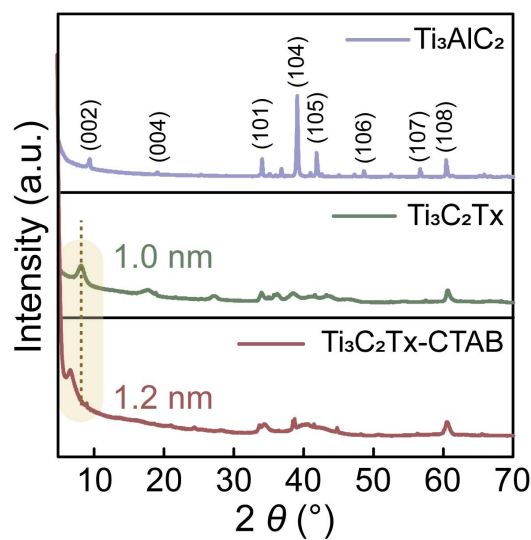

Fig. S5 The XRD patterns of  $\text{Ti}_3\text{AlC}_2$ ,  $\text{Ti}_3\text{C}_2\text{T}_x$  and  $\text{Ti}_3\text{C}_2\text{T}_x\text{-CTAB}$ .

Supplement: d4ee00580e31.pdf [file d4ee00580e31.pdf]

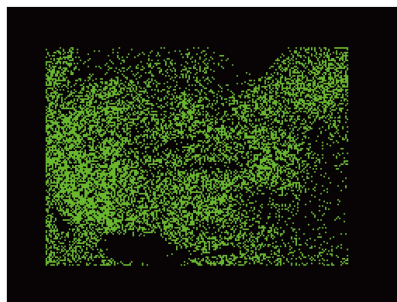

**Fig. S6** EDS mapping image of F element in  $\text{Ti}_3\text{C}_2\text{T}_x\text{-CTAB}$ .

Supplement: d4ee00580e32.pdf [file d4ee00580e32.pdf]

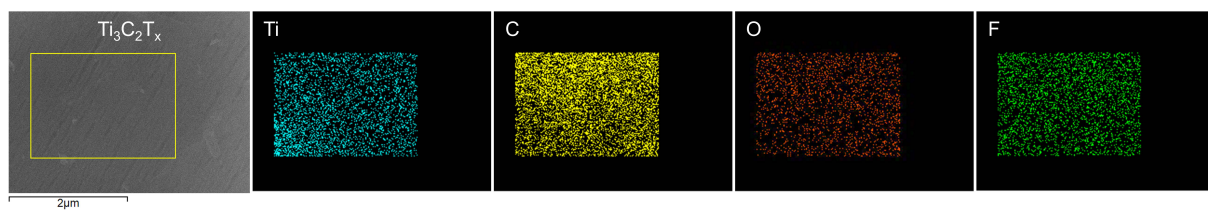

**Fig. S7** EDS mapping images of  $\text{Ti}_3\text{C}_2\text{T}_x$  MXene.

Supplement: d4ee00580e33.pdf [file d4ee00580e33.pdf]

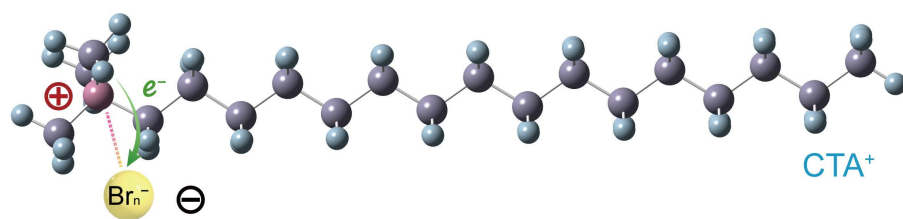

Fig. S9 Electron transfer after CTAB complexing with bromine.

Supplement: d4ee00580e35.pdf [file d4ee00580e35.pdf]

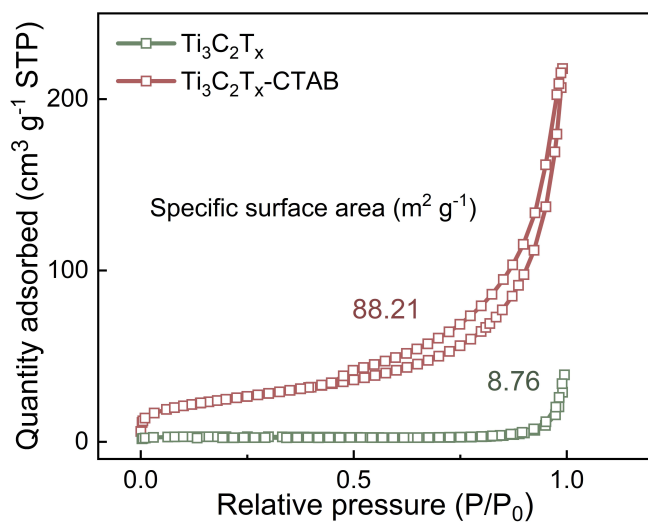

Fig. S16  $\text{N}_2$  sorption isotherms curves of  $\text{Ti}_3\text{C}_2\text{T}_x$  and  $\text{Ti}_3\text{C}_2\text{T}_x\text{-CTAB}$ .

Supplement: d4ee00580e9.pdf [file d4ee00580e9.pdf]
